# Supplementary material
Source: Research Square preprint supplement (doi:10.21203/rs.3.rs-9966353/v1)
Supplement: Supplementary file 1 [file 9b10435b01c693a83aa3bebd.docx]

**Supplementary Materials**

*Allergic Rhinitis and Allergic Sensitization in Pediatric Otitis Media with Effusion: A Systematic Review and Meta-Analysis with Narrative Synthesis of Eustachian Tube Dysfunction*

Alina-Mihaela Petre, Romeo Costin, Ion Anghel

**Table S1. Search strategy.**

| **Database** | **Search strategy** |
| --- | --- |
| PubMed/MEDLINE | ("allergic rhinitis" OR rhinitis OR allergy OR atopy OR "IgE sensitization") AND ("otitis media with effusion" OR OME OR "middle ear effusion" OR "Eustachian tube dysfunction" OR ETD OR tympanometry OR "middle-ear dysfunction") |
| Scopus | TITLE-ABS-KEY ("allergic rhinitis" OR rhinitis OR allergy OR atopy OR "IgE sensitization") AND TITLE-ABS-KEY ("otitis media with effusion" OR OME OR "middle ear effusion" OR "Eustachian tube dysfunction" OR ETD OR tympanometry OR "middle-ear dysfunction") |
| Cochrane Library | allergic rhinitis OR rhinitis OR allergy OR atopy OR IgE sensitization AND otitis media with effusion OR OME OR Eustachian tube dysfunction OR tympanometry |

**Note:** The final search was performed on 8 June 2026. No date restriction was applied.

**Table S2. Excluded reports and reasons.**

| **Category** | **Number of reports** | **Main reasons** |
| --- | --- | --- |
| Excluded after title/abstract screening | 906 | Clearly irrelevant topic, non-human studies, unrelated outcomes, unrelated exposure, acute otitis media only, reviews, editorials, or case reports. |
| Reports not retrieved | 4 | Full text or sufficient bibliographic details unavailable. |
| Excluded after eligibility assessment | 26 | No eligible comparator, no extractable data, duplicate or overlapping cohort, wrong outcome, qualitative/background-only design, or source not verifiable. |
