# Supplementary material
Source: Research Square preprint supplement (doi:10.21203/rs.3.rs-9966353/v1)
Supplement: Supplementary file 2 [file ff031268a5cb0936cd3a2dd2.docx]

**Supplementary Materials:** Table S1: Search strategy; Table S2: Excluded reports and reasons; Figure S1: Expanded sensitivity analysis including Adekanye et al. 2024.
